# Supplementary material
Source: Elsevier journal article supplement (https://www.sciencedirect.com/science/article/pii/S0211699519300785)
Supplement: mmc1 [file S0211699519300785:mmc1.doc]

**Supplementary Table. MAP3K inhibitors.** List according to a search in Scifinder (https://scifinder.cas.org) by their official gene symbol and alternative names performed on September 15, 2018.

| **Gene symbol (name)** | **Inhibitors** | **Representative inhibitor** | **Ref** | **Inhibitors in clinical use** | **Ref** |
| --- | --- | --- | --- | --- | --- |
| **MAP3K1** (MEKK1) | **No** |  |  | No | **--------** |
| **MAP3K2** | **Yes** |  | [1] | No | **--------** |
| **MAP3K3** (MEKK3) | **No** |  |  | No | **--------** |
| **MAP3K4** | **No** |  |  | No | **--------** |
| **MAP3K5** (ASK1) | **Yes** | GS-4997 (Phase 2) | [2–4] | No | **--------** |
| **MAP3K6** (ASK2) | **No** |  |  | No | **--------** |
| **MAP3K7** (MEKK7, TAK1) | **Yes** | 5Z-7-oxozeaenol | [5,6] | No | **--------** |
| **MAP3K8** (TPL2) | **Yes** |  | [7] | No | **--------** |
| **MAP3K9** | **No** |  |  | No | **--------** |
| **MAP3K10** | **No** |  |  | No | **--------** |
| **MAP3K11** (MEKK11, MLK3) | **Yes** | URMC-099 | [8,9] | No | ----------- |
| ------------ | [10] |
| --------------- | [11] |
| **MAP3K12** (MUK, DLK) | **Yes** | ---------- | [12] | Sunitinib (Sutent, SU11248) | [13] |
| CEP-1347 | [11,14,15] |
| GNE-3511 | [16,17] |
| GNE-8505 | [18] |
| **MAP3K13** (LZK) | **Yes** | **-------** | [10] | No | **--------** |
| **MAP3K14** (NIK) | **Yes** | ------ | [19] | No | ------------------ |
| NIK SMI1 | [20] |
|  | [21] |
| Patent | [22] |
|  | [23] |
|  | [24] |
| Patent | [25] |
| **MAP3K15** (ASK3) | **No** | **---------** | **-------** | No | **--------** |
| **MAP3K16** (TAO1, TAOK1) | Yes |  | [26] | No | ---------- |
| Patent | [27] |
| **MAP3K17** (TAO2, TAOK2) | **Yes** | Patent | [28] | No | **--------** |
| **-** | [29] |
| **RAF1 (CRAF)** | **Yes** |  | [30] | Regorafenib (Stivarga)  Inhibition of RAF-1>BRAF | **FDA approval**  [31–33] |
| Sorafenib (Nexavar; Sorafenibum; BAY 43-9006). Inhibition of RAF1>BRAF | **FDA approval** [34,35] |
|  | [36] | Vemurafenib (Zelboraf, PLX4032/RG7204/RO5185426), inhibition of RAF1 ~BRAF | **FDA approval** [37,38] |
| GW5074 | [39] | Dabrafenib  (Tafinlar, GSK2118436) inhibition BRAF>RAF1 | **FDA approval** [40] |
| PLX-4720 | [41] | Lifirafenib (BGB-283)  Inhibition RAF1>BRAF | **In clinical trials**  [42] |
| AZ628 | [43] |  |  |
| ZM 336372 | [44] [45] |
| GW 5074 | [46] |
| RAF265 | [47] |
| NVP-BHG712 | [48] |
| TAK-632 | [49] |
| RAF709 | [50] |
| CCT196969 | [51] |
| CCT241161 | [51] |
| BAW2881 (NVP-BAW2881 | [52] |
| LY3009120 | [53] |
| **BRAF** | **Yes** |  | [54] | Encorafenib (Braftovi, LGX818) selectivity for BRAF | **FDA approval** [55] |
|  | [56] |
| SB-590885/SB-699393 | [57] |
| AZ304 | [58] |
| GDC-0879 | [59] |
| CEP-32496 | [60] |
| RO5126766 (CH5126766) | [61] |
|  | [62–70] |  |  |
| **ARAF** | **Yes** | LY3009120 | [71,72] | Lifirafenib (BGB-283)  Inhibition  A-RAF>> RAF1>BRAF | **In clinical trials**  [42] |
| **ZAK** (MLT, MLTK, HCCS-4, MRK, AZK)* | **Yes** |  | [73] | Sorafenib | [74] |
| PLX-4720 | [41] | Vemurafenib | [75] |
| AST-487 | [76] | Imatinib (Gleevec) | **FDA approval** [77–79] |
|  | [80] | Nilotinib (Tasigna) | **FDA approval** [81–84] |
|  | [85] | Ponatinib (Iclusig) | **FDA approval** [86] |
|  |  | Motesanib/AMG-706 | [87] |
|  |  | Bofutinib/SKI-606 (Bosulif) | **FDA approval** [88,89] |

**References**

[1] Ahmad S, St Hilaire VR, Dandepally SR, Johnson GL, Williams AL, Scott JE. Discovery and characterization of an iminocoumarin scaffold as an inhibitor of MEKK2 (MAP3K2). Biochem Biophys Res Commun 2018;496:205–11. doi:10.1016/j.bbrc.2018.01.027.

[2] Lin JH, Zhang JJ, Lin S-L, Chertow GM. Design of a phase 2 clinical trial of an ASK1 inhibitor, GS-4997, in patients with diabetic kidney disease. Nephron 2015;129:29–33. doi:10.1159/000369152.

[3] Lanier M, Pickens J, Bigi S V, Bradshaw-Pierce EL, Chambers A, Cheruvallath ZS, et al. Structure-Based Design of ASK1 Inhibitors as Potential Agents for Heart Failure. ACS Med Chem Lett 2017;8:316–20. doi:10.1021/acsmedchemlett.6b00481.

[4] Gibson TS, Johnson B, Fanjul A, Halkowycz P, Dougan DR, Cole D, et al. Structure-based drug design of novel ASK1 inhibitors using an integrated lead optimization strategy. Bioorg Med Chem Lett 2017;27:1709–13. doi:10.1016/j.bmcl.2017.02.079.

[5] Kilty I, Jones LH. TAK1 selective inhibition: state of the art and future opportunities. Future Med Chem 2015;7:23–33. doi:10.4155/fmc.14.138.

[6] Tan L, Gurbani D, Weisberg EL, Hunter JC, Li L, Jones DS, et al. Structure-guided development of covalent TAK1 inhibitors. Bioorg Med Chem 2017;25:838–46. doi:10.1016/j.bmc.2016.11.035.

[7] Ni Y, Gopalsamy A, Cole D, Hu Y, Denny R, Ipek M, et al. Identification and SAR of a new series of thieno[3,2-d]pyrimidines as Tpl2 kinase inhibitors. Bioorg Med Chem Lett 2011;21:5952–6. doi:10.1016/j.bmcl.2011.07.069.

[8] Goodfellow VS, Loweth CJ, Ravula SB, Wiemann T, Nguyen T, Xu Y, et al. Discovery, synthesis, and characterization of an orally bioavailable, brain penetrant inhibitor of mixed lineage kinase 3. J Med Chem 2013;56:8032–48. doi:10.1021/jm401094t.

[9] Rhoo KH, Granger M, Sur J, Feng C, Gelbard HA, Dewhurst S, et al. Pharmacologic inhibition of MLK3 kinase activity blocks the in vitro migratory capacity of breast cancer cells but has no effect on breast cancer brain metastasis in a mouse xenograft model. PLoS One 2014;9:e108487. doi:10.1371/journal.pone.0108487.

[10] Gelbard HA, Dewhurst S, Goodfellow VS, Wiemann T, Ravula SB, Loweth CJ. Preparation of bicyclic heteroaryl kinase inhibitors. PCT Int Appl (2011), WO 2011149950 A2 20111201 n.d.

[11] Hudkins RL, Diebold JL, Tao M, Josef KA, Park CH, Angeles TS, et al. Mixed-lineage kinase 1 and mixed-lineage kinase 3 subtype-selective dihydronaphthyl[3,4-a]pyrrolo[3,4-c]carbazole-5-ones: optimization, mixed-lineage kinase 1 crystallography, and oral in vivo activity in 1-methyl-4-phenyltetrahydropyridine models. J Med Chem 2008;51:5680–9. doi:10.1021/jm8005838.

[12] Siu M, Sengupta Ghosh A, Lewcock JW. Dual Leucine Zipper Kinase Inhibitors for the Treatment of Neurodegeneration. J Med Chem 2018;61:8078–87. doi:10.1021/acs.jmedchem.8b00370.

[13] http://www.fda.gov/bbs/topics/news/2006/NEW01302.html n.d.

[14] Maroney AC, Finn JP, Connors TJ, Durkin JT, Angeles T, Gessner G, et al. Cep-1347 (KT7515), a semisynthetic inhibitor of the mixed lineage kinase family. J Biol Chem 2001;276:25302–8. doi:10.1074/jbc.M011601200.

[15] Sweeney ZK, Lewcock JW. ACS chemical neuroscience spotlight on CEP-1347. ACS Chem Neurosci 2011;2:3–4. doi:10.1021/cn1000793.

[16] Patel S, Cohen F, Dean BJ, De La Torre K, Deshmukh G, Estrada AA, et al. Discovery of dual leucine zipper kinase (DLK, MAP3K12) inhibitors with activity in neurodegeneration models. J Med Chem 2015;58:401–18. doi:10.1021/jm5013984.

[17] Patel S, Harris SF, Gibbons P, Deshmukh G, Gustafson A, Kellar T, et al. Scaffold-Hopping and Structure-Based Discovery of Potent, Selective, And Brain Penetrant N-(1H-Pyrazol-3-yl)pyridin-2-amine Inhibitors of Dual Leucine Zipper Kinase (DLK, MAP3K12). J Med Chem 2015;58:8182–99. doi:10.1021/acs.jmedchem.5b01072.

[18] Patel S, Meilandt WJ, Erickson RI, Chen J, Deshmukh G, Estrada AA, et al. Selective Inhibitors of Dual Leucine Zipper Kinase (DLK, MAP3K12) with Activity in a Model of Alzheimer’s Disease. J Med Chem 2017;60:8083–102. doi:10.1021/acs.jmedchem.7b00843.

[19] Blaquiere N, Castanedo GM, Burch JD, Berezhkovskiy LM, Brightbill H, Brown S, et al. Scaffold-Hopping Approach To Discover Potent, Selective, and Efficacious Inhibitors of NF-κB Inducing Kinase. J Med Chem 2018;61:6801–13. doi:10.1021/acs.jmedchem.8b00678.

[20] Brightbill HD, Suto E, Blaquiere N, Ramamoorthi N, Sujatha-Bhaskar S, Gogol EB, et al. NF-κB inducing kinase is a therapeutic target for systemic lupus erythematosus. Nat Commun 2018;9:179. doi:10.1038/s41467-017-02672-0.

[21] Pippione AC, Sainas S, Federico A, Lupino E, Piccinini M, Kubbutat M, et al. N-Acetyl-3-aminopyrazoles block the non-canonical NF-kB cascade by selectively inhibiting NIK. Medchemcomm 2018;9:963–8. doi:10.1039/c8md00068a.

[22] Stansfield I, Querolle OAG, Ligny YAE, Gross GM, Jacoby E, Meerpoel L, et al. Heteroaromatic derivatives as NIK inhibitors and their preparation. PCT Int Appl (2018), WO 2018002217 A1 20180104 n.d.

[23] Castanedo GM, Blaquiere N, Beresini M, Bravo B, Brightbill H, Chen J, et al. Structure-Based Design of Tricyclic NF-κB Inducing Kinase (NIK) Inhibitors That Have High Selectivity over Phosphoinositide-3-kinase (PI3K). J Med Chem 2017;60:627–40. doi:10.1021/acs.jmedchem.6b01363.

[24] Li K, McGee LR, Fisher B, Sudom A, Liu J, Rubenstein SM, et al. Inhibiting NF-κB-inducing kinase (NIK): discovery, structure-based design, synthesis, structure-activity relationship, and co-crystal structures. Bioorg Med Chem Lett 2013;23:1238–44. doi:10.1016/j.bmcl.2013.01.012.

[25] Chen,G, Cushing TD, Fisher B, He X, Li K, Li Z, McGee LR, Pattaropong V, Faulder P, Seganish JL SY. Alkynyl alcohols as kinase inhibitors and their preparation, pharmaceutical compositions and use in the treatment of inflammation and inflammatory disorders. PCT Int Appl (2009), WO 2009158011 A1 20091230 n.d.

[26] Koo C-Y, Giacomini C, Reyes-Corral M, Olmos Y, Tavares IA, Marson CM, et al. Targeting TAO Kinases Using a New Inhibitor Compound Delays Mitosis and Induces Mitotic Cell Death in Centrosome Amplified Breast Cancer Cells. Mol Cancer Ther 2017;16:2410–21. doi:10.1158/1535-7163.MCT-17-0077.

[27] Xu, Wei; Zheng, Wentao; Baly, Deborah Lynn; Galan, Adam Antoni; Ibrahim, Mohamed Abdulkader; Jaeger, Christopher; Kearney, Patrick; Leahy, James William; Lewis, Gary Lee; McMillan K et al. TAO kinase inhibitors for pharmaceutical use and for screening for kinase modulators. PCT Int Appl (2005), WO 2005040355 A2 20050506 n.d.

[28] Goldsmith, Elizabeth J.; Piala, Alexander T.; Potts MB. Compositions and methods comprising Thousand-​And-​One Kinase 2 (TAOK2) inhibitors and modulators of autophagy for cancer treatment. US Pat Appl Publ (2017), US 20170340636 A1 20171130 n.d.

[29] Piala AT, Akella R, Potts MB, Dudics-Giagnocavo SA, He H, Wei S, et al. Discovery of novel TAOK2 inhibitor scaffolds from high-throughput screening. Bioorg Med Chem Lett 2016;26:3923–7. doi:10.1016/j.bmcl.2016.07.016.

[30] Geijtenbeek, Teunis Bernard Herman; Bouwman-Gringhuis SI. Inhibitors of RAF1, MST1, and PKL1 for use in the treatment of a retrovirus. From PCT Int Appl (2016), WO 2016135046 A1 20160901 n.d.

[31] https://www.drugs.com/newdrugs/fda-expands-approved-stivarga-regorafenib-hepatocellular-carcinoma-4522.html n.d.

[32] https://www.drugs.com/newdrugs/fda-approves-stivarga-advanced-gastrointestinal-stromal-tumors-3702.html n.d.

[33] https://www.drugs.com/newdrugs/fda-approves-stivarga-advanced-colorectal-cancer-3511.html n.d.

[34] https://www.accessdata.fda.gov/drugsatfda_docs/label/2010/021923s008s009lbl.pdf n.d.

[35] https://www.accessdata.fda.gov/drugsatfda_docs/nda/2005/021923_s000_NexavarTOC.cfm n.d.

[36] Cho HJ, El-Gamal MI, Oh C-H, Lee SH, Sim T, Kim G, et al. Novel quinolinylaminoisoquinoline bioisosteres of sorafenib as selective RAF1 kinase inhibitors: design, synthesis, and antiproliferative activity against melanoma cell line. Chem Pharm Bull (Tokyo) 2013;61:747–56.

[37] https://www.drugs.com/newdrugs/fda-approves-zelboraf-vemurafenib-erdheim-chester-braf-v600-mutation-4625.html n.d.

[38] https://www.drugs.com/newdrugs/fda-approves-zelboraf-companion-diagnostic-test-late-stage-skin-cancer-2814.html n.d.

[39] Yue X, Varga E V, Stropova D, Vanderah TW, Yamamura HI, Roeske WR. Chronic morphine-mediated adenylyl cyclase superactivation is attenuated by the Raf-1 inhibitor, GW5074. Eur J Pharmacol 2006;540:57–9. doi:10.1016/j.ejphar.2006.04.033.

[40] https://www.drugs.com/newdrugs/fda-approves-tafinlar-dabrafenib-advanced-melanoma-3797.html n.d.

[41] Tsai J, Lee JT, Wang W, Zhang J, Cho H, Mamo S, et al. Discovery of a selective inhibitor of oncogenic B-Raf kinase with potent antimelanoma activity. Proc Natl Acad Sci U S A 2008;105:3041–6. doi:10.1073/pnas.0711741105.

[42] Tang Z, Yuan X, Du R, Cheung S-H, Zhang G, Wei J, et al. BGB-283, a Novel RAF Kinase and EGFR Inhibitor, Displays Potent Antitumor Activity in BRAF-Mutated Colorectal Cancers. Mol Cancer Ther 2015;14:2187–97. doi:10.1158/1535-7163.MCT-15-0262.

[43] Noeparast A, Giron P, De Brakeleer S, Eggermont C, De Ridder U, Teugels E, et al. Type II RAF inhibitor causes superior ERK pathway suppression compared to type I RAF inhibitor in cells expressing different BRAF mutant types recurrently found in lung cancer. Oncotarget 2018;9:16110–23. doi:10.18632/oncotarget.24576.

[44] Hall-Jackson CA, Eyers PA, Cohen P, Goedert M, Boyle FT, Hewitt N, et al. Paradoxical activation of Raf by a novel Raf inhibitor. Chem Biol 1999;6:559–68.

[45] Kunnimalaiyaan M, Chen H. The Raf-1 pathway: a molecular target for treatment of select neuroendocrine tumors? Anticancer Drugs 2006;17:139–42.

[46] Lackey K, Cory M, Davis R, Frye S V, Harris PA, Hunter RN, et al. The discovery of potent cRaf1 kinase inhibitors. Bioorg Med Chem Lett 2000;10:223–6.

[47] Williams TE, Subramanian S, Verhagen J, McBride CM, Costales A, Sung L, et al. Discovery of RAF265: A Potent mut-B-RAF Inhibitor for the Treatment of Metastatic Melanoma. ACS Med Chem Lett 2015;6:961–5. doi:10.1021/ml500526p.

[48] Kathawala RJ, Wei L, Anreddy N, Chen K, Patel A, Alqahtani S, et al. The small molecule tyrosine kinase inhibitor NVP-BHG712 antagonizes ABCC10-mediated paclitaxel resistance: a preclinical and pharmacokinetic study. Oncotarget 2015;6:510–21. doi:10.18632/oncotarget.2638.

[49] Okaniwa M, Hirose M, Arita T, Yabuki M, Nakamura A, Takagi T, et al. Discovery of a selective kinase inhibitor (TAK-632) targeting pan-RAF inhibition: design, synthesis, and biological evaluation of C-7-substituted 1,3-benzothiazole derivatives. J Med Chem 2013;56:6478–94. doi:10.1021/jm400778d.

[50] Nishiguchi GA, Rico A, Tanner H, Aversa RJ, Taft BR, Subramanian S, et al. Design and Discovery of N-(2-Methyl-5’-morpholino-6’-((tetrahydro-2H-pyran-4-yl)oxy)-[3,3’-bipyridin]-5-yl)-3-(trifluoromethyl)benzamide (RAF709): A Potent, Selective, and Efficacious RAF Inhibitor Targeting RAS Mutant Cancers. J Med Chem 2017;60:4869–81. doi:10.1021/acs.jmedchem.6b01862.

[51] Girotti MR, Lopes F, Preece N, Niculescu-Duvaz D, Zambon A, Davies L, et al. Paradox-breaking RAF inhibitors that also target SRC are effective in drug-resistant BRAF mutant melanoma. Cancer Cell 2015;27:85–96. doi:10.1016/j.ccell.2014.11.006.

[52] Halin C, Fahrngruber H, Meingassner JG, Bold G, Littlewood-Evans A, Stuetz A, et al. Inhibition of chronic and acute skin inflammation by treatment with a vascular endothelial growth factor receptor tyrosine kinase inhibitor. Am J Pathol 2008;173:265–77. doi:10.2353/ajpath.2008.071074.

[53] Henry JR, Kaufman MD, Peng S-B, Ahn YM, Caldwell TM, Vogeti L, et al. Discovery of 1-(3,3-dimethylbutyl)-3-(2-fluoro-4-methyl-5-(7-methyl-2-(methylamino)pyrido[2,3-d]pyrimidin-6-yl)phenyl)urea (LY3009120) as a pan-RAF inhibitor with minimal paradoxical activation and activity against BRAF or RAS mutant tumor cells. J Med Chem 2015;58:4165–79. doi:10.1021/acs.jmedchem.5b00067.

[54] El-Nassan HB. Recent progress in the identification of BRAF inhibitors as anti-cancer agents. Eur J Med Chem 2014;72:170–205. doi:10.1016/j.ejmech.2013.11.018.

[55] https://www.drugs.com/newdrugs/array-biopharma-announces-fda-approval-braftovi-encorafenib-combination-mektovi-binimetinib-4771.html n.d.

[56] Rahman MA, Salajegheh A, Smith RA, Lam AK-Y. BRAF inhibitors: From the laboratory to clinical trials. Crit Rev Oncol Hematol 2014;90:220–32. doi:10.1016/j.critrevonc.2013.12.008.

[57] Takle AK, Brown MJB, Davies S, Dean DK, Francis G, Gaiba A, et al. The identification of potent and selective imidazole-based inhibitors of B-Raf kinase. Bioorg Med Chem Lett 2006;16:378–81. doi:10.1016/j.bmcl.2005.09.072.

[58] Ma R, Xu L, Qu X, Che X, Zhang Y, Fan Y, et al. AZ304, a novel dual BRAF inhibitor, exerts anti-tumour effects in colorectal cancer independently of BRAF genetic status. Br J Cancer 2018;118:1453–63. doi:10.1038/s41416-018-0086-x.

[59] Hansen JD, Grina J, Newhouse B, Welch M, Topalov G, Littman N, et al. Potent and selective pyrazole-based inhibitors of B-Raf kinase. Bioorg Med Chem Lett 2008;18:4692–5. doi:10.1016/j.bmcl.2008.07.002.

[60] Rowbottom MW, Faraoni R, Chao Q, Campbell BT, Lai AG, Setti E, et al. Identification of 1-(3-(6,7-dimethoxyquinazolin-4-yloxy)phenyl)-3-(5-(1,1,1-trifluoro-2-methylpropan-2-yl)isoxazol-3-yl)urea hydrochloride (CEP-32496), a highly potent and orally efficacious inhibitor of V-RAF murine sarcoma viral oncogene homologue B1 (BRAF) V600E. J Med Chem 2012;55:1082–105. doi:10.1021/jm2009925.

[61] Martinez-Garcia M, Banerji U, Albanell J, Bahleda R, Dolly S, Kraeber-Bodéré F, et al. First-in-human, phase I dose-escalation study of the safety, pharmacokinetics, and pharmacodynamics of RO5126766, a first-in-class dual MEK/RAF inhibitor in patients with solid tumors. Clin Cancer Res 2012;18:4806–19. doi:10.1158/1078-0432.CCR-12-0742.

[62] Ramurthy S, Subramanian S, Aikawa M, Amiri P, Costales A, Dove J, et al. Design and synthesis of orally bioavailable benzimidazoles as Raf kinase inhibitors. J Med Chem 2008;51:7049–52. doi:10.1021/jm801050k.

[63] Suijkerbuijk BMJM, Niculescu-Duvaz I, Gaulon C, Dijkstra HP, Niculescu-Duvaz D, Ménard D, et al. Development of novel, highly potent inhibitors of V-RAF murine sarcoma viral oncogene homologue B1 (BRAF): increasing cellular potency through optimization of a distal heteroaromatic group. J Med Chem 2010;53:2741–56. doi:10.1021/jm900607f.

[64] Zambon A, Ménard D, Suijkerbuijk BMJM, Niculescu-Duvaz I, Whittaker S, Niculescu-Duvaz D, et al. Novel hinge binder improves activity and pharmacokinetic properties of BRAF inhibitors. J Med Chem 2010;53:5639–55. doi:10.1021/jm100383b.

[65] Gould AE, Adams R, Adhikari S, Aertgeerts K, Afroze R, Blackburn C, et al. Design and optimization of potent and orally bioavailable tetrahydronaphthalene Raf inhibitors. J Med Chem 2011;54:1836–46. doi:10.1021/jm101479y.

[66] Wang X, Berger DM, Salaski EJ, Torres N, Dutia M, Hanna C, et al. Indazolylpyrazolopyrimidine as highly potent B-Raf inhibitors with in vivo activity. J Med Chem 2010;53:7874–8. doi:10.1021/jm1007566.

[67] Packard GK, Papa P, Riggs JR, Erdman P, Tehrani L, Robinson D, et al. Discovery and optimization of thieno[2,3-d]pyrimidines as B-Raf inhibitors. Bioorg Med Chem Lett 2012;22:747–52. doi:10.1016/j.bmcl.2011.03.006.

[68] Vasbinder MM, Aquila B, Augustin M, Chen H, Cheung T, Cook D, et al. Discovery and optimization of a novel series of potent mutant B-Raf(V600E) selective kinase inhibitors. J Med Chem 2013;56:1996–2015. doi:10.1021/jm301658d.

[69] Ringberg A, Palmer B, Linell F, Rychterova V, Ljungberg O. Bilateral and multifocal breast carcinoma. A clinical and autopsy study with special emphasis on carcinoma in situ. Eur J Surg Oncol 1991;17:20–9.

[70] Qin J, Xie P, Ventocilla C, Zhou G, Vultur A, Chen Q, et al. Identification of a novel family of BRAF(V600E) inhibitors. J Med Chem 2012;55:5220–30. doi:10.1021/jm3004416.

[71] Peng S-B, Henry JR, Kaufman MD, Lu W-P, Smith BD, Vogeti S, et al. Inhibition of RAF Isoforms and Active Dimers by LY3009120 Leads to Anti-tumor Activities in RAS or BRAF Mutant Cancers. Cancer Cell 2015;28:384–98. doi:10.1016/j.ccell.2015.08.002.

[72] Vernier, Jean-Michel; O’Connor, Patrick; Ripke, William; Matthews, David; Pinkerton A. Heterocyclic kinase inhibitors as therapeutic agents. PCT Int Appl (2011), WO 2011038261 A1 20110331 n.d.

[73] Chang Y, Zhang Q, Li Z, Ding K, Lu X. Leucine-zipper and Sterile-α Motif Kinase (ZAK): A Potential Target for Drug Discovery. Curr Med Chem 2016;23:3801–12.

[74] Vin H, Ching G, Ojeda SS, Adelmann CH, Chitsazzadeh V, Dwyer DW, et al. Sorafenib suppresses JNK-dependent apoptosis through inhibition of ZAK. Mol Cancer Ther 2014;13:221–9. doi:10.1158/1535-7163.MCT-13-0561.

[75] Mathea S, Abdul Azeez KR, Salah E, Tallant C, Wolfreys F, Konietzny R, et al. Structure of the Human Protein Kinase ZAK in Complex with Vemurafenib. ACS Chem Biol 2016;11:1595–602. doi:10.1021/acschembio.6b00043.

[76] Akeno-Stuart N, Croyle M, Knauf JA, Malaguarnera R, Vitagliano D, Santoro M, et al. The RET kinase inhibitor NVP-AST487 blocks growth and calcitonin gene expression through distinct mechanisms in medullary thyroid cancer cells. Cancer Res 2007;67:6956–64. doi:10.1158/0008-5472.CAN-06-4605.

[77] https://www.drugs.com/newdrugs/fda-approves-gleevec-prevent-recurrence-rare-gastrointestinal-cancer-1213.html n.d.

[78] https://www.drugs.com/newdrugs/fda-approves-gleevec-expanded-patients-rare-gastrointestinal-cancer-3081.html n.d.

[79] https://www.drugs.com/newdrugs/fda-approves-gleevec-children-acute-lymphoblastic-leukemia-3665.html n.d.

[80] Chang Y, Lu X, Shibu MA, Dai Y-B, Luo J, Zhang Y, et al. Structure Based Design of N-(3-((1H-Pyrazolo[3,4-b]pyridin-5-yl)ethynyl)benzenesulfonamides as Selective Leucine-Zipper and Sterile-α Motif Kinase (ZAK) Inhibitors. J Med Chem 2017;60:5927–32. doi:10.1021/acs.jmedchem.7b00572.

[81] https://www.drugs.com/newdrugs/tasigna-receives-us-approval-providing-new-hope-chronic-myeloid-leukemia-patients-resistance-696.html n.d.

[82] https://www.drugs.com/newdrugs/novartis-international-ag-ch-fda-approves-tasigna-newly-diagnosed-chronic-myeloid-leukemia-patients-2190.html n.d.

[83] https://www.drugs.com/newdrugs/fda-updates-label-tasigna-reflect-certain-patients-type-leukemia-may-eligible-stop-after-sustained-4674.html n.d.

[84] https://www.drugs.com/newdrugs/novartis-tasigna-approved-fda-children-rare-leukemia-4715.html n.d.

[85] Wang X, Mader MM, Toth JE, Yu X, Jin N, Campbell RM, et al. Complete inhibition of anisomycin and UV radiation but not cytokine induced JNK and p38 activation by an aryl-substituted dihydropyrrolopyrazole quinoline and mixed lineage kinase 7 small interfering RNA. J Biol Chem 2005;280:19298–305. doi:10.1074/jbc.M413059200.

[86] https://www.drugs.com/newdrugs/fda-approves-iclusig-two-rare-types-leukemia-3589.html n.d.

[87] Rosen LS, Kurzrock R, Mulay M, Van Vugt A, Purdom M, Ng C, et al. Safety, pharmacokinetics, and efficacy of AMG 706, an oral multikinase inhibitor, in patients with advanced solid tumors. J Clin Oncol 2007;25:2369–76. doi:10.1200/JCO.2006.07.8170.

[88] https://www.drugs.com/newdrugs/fda-approves-bosulif-chronic-myelogenous-leukemia-3478.html n.d.

[89] https://www.drugs.com/newdrugs/fda-approves-pfizer-s-bosulif-bosutinib-patients-newly-diagnosed-ph-chronic-myelogenous-leukemia-cml-4675.htmlcto n.d.
